# Supplementary material for: Effector gene reshuffling involves dispensable mini-chromosomes in the wheat blast fungus
Source: PLoS Genet. 2019 Sep 12;15(9):e1008272. doi: 10.1371/journal.pgen.1008272 (PMC6741851; doi:10.1371/journal.pgen.1008272)
Supplement: S6 Data — (XLSX) [file pgen.1008272.s026.xlsx]

## Sheet: supple_data
Data S6. List of putative effectors
ID	Locus
BSY92_00035	chr3:118155-118914
BSY92_00042	chr3:138180-138645
BSY92_00045	chr3:144009-145696
BSY92_00060	chr3:194674-195721
BSY92_00065	chr3:210473-210707
BSY92_00110	chr3:351398-352292
BSY92_00209	chr3:665922-666242
BSY92_00270	chr3:841033-842662
BSY92_00291	chr3:931714-932626
BSY92_00314	chr3:999224-1000004
BSY92_00389	chr3:1235052-1235670
BSY92_00414	chr3:1291020-1292776
BSY92_00415	chr3:1296187-1298025
BSY92_00422	chr3:1318717-1319104
BSY92_00425	chr3:1328999-1329242
BSY92_00440	chr3:1376938-1377320
BSY92_00522	chr3:1874576-1875457
BSY92_00548	chr3:2047751-2048554
BSY92_00550	chr3:2060915-2062147
BSY92_00584	chr3:2681297-2681789
BSY92_00650	chr3:3118094-3119519
BSY92_01556	chr3:6023025-6023322
BSY92_01724	chr3:6648979-6649534
BSY92_01761	chr3:6759096-6759696
BSY92_01782	chr3:6829867-6831749
BSY92_01783	chr3:6832221-6832840
BSY92_01785	chr3:6837044-6837551
BSY92_01798	chr3:6877281-6877644
BSY92_01801	chr3:6882847-6884277
BSY92_01820	chr3:6922287-6922974
BSY92_01831	chr3:6975725-6976304
BSY92_01884	chr3:7097504-7098187
BSY92_01923	chr3:7202964-7204614
BSY92_02043	chr3:8058198-8058680
BSY92_02044	chr3:8060168-8060459
BSY92_02051	chr2:40052-40727
BSY92_02098	chr2:201540-202424
BSY92_02114	chr2:252333-253218
BSY92_02681	chr2:2211937-2213246
BSY92_02707	chr2:2303723-2304185
BSY92_02716	chr2:2340616-2341349
BSY92_03093	chr2:3604027-3606673
BSY92_03168	chr2:3859844-3860336
BSY92_03575	chr2:5332077-5332305
BSY92_04149	chr2:7200301-7200790
BSY92_04193	chr2:7351683-7352061
BSY92_04199	chr2:7366814-7368040
BSY92_04206	chr2:7393080-7393849
BSY92_04253	chr2:7553898-7554715
BSY92_04259	chr2:7566793-7567113
BSY92_04279	chr2:7617591-7618390
BSY92_04322	chr2:7750766-7752485
BSY92_04363	chr2:7872043-7874444
BSY92_04391	chr1:189101-189867
BSY92_04435	chr1:505223-505826
BSY92_04467	chr1:610288-610785
BSY92_04526	chr1:782578-783856
BSY92_04556	chr1:880259-881582
BSY92_04563	chr1:905839-906670
BSY92_04564	chr1:908442-908769
BSY92_04605	chr1:1165404-1166796
BSY92_04606	chr1:1168380-1169188
BSY92_04642	chr1:1296298-1296943
BSY92_04690	chr1:1449044-1449731
BSY92_04707	chr1:1517301-1519051
BSY92_04722	chr1:1571873-1572293
BSY92_04731	chr1:1599263-1599596
BSY92_04736	chr1:1631070-1631568
BSY92_04786	chr1:2188074-2188893
BSY92_04826	chr1:2318434-2318800
BSY92_05176	chr1:3499876-3500284
BSY92_05184	chr1:3585725-3586352
BSY92_05219	chr1:3705612-3706285
BSY92_05492	chr1:4616504-4617074
BSY92_05774	chr1:5620368-5621996
BSY92_05838	chr1:5849903-5850260
BSY92_05959	chr1:6330812-6331208
BSY92_05966	chr1:6348116-6350228
BSY92_06008	chr6:103569-104064
BSY92_06085	chr6:353111-353778
BSY92_06155	chr6:547398-548151
BSY92_06341	chr6:1162733-1163442
BSY92_06587	chr6:2031918-2032771
BSY92_06590	chr6:2038323-2039116
BSY92_06601	chr6:2066679-2067333
BSY92_06702	chr6:2440907-2441285
BSY92_06734	chr6:2545348-2545867
BSY92_06781	chr6:2716975-2717460
BSY92_06882	chr6:3041366-3042452
BSY92_06924	chr6:3204306-3205540
BSY92_07101	chr6:3930348-3930766
BSY92_07389	chr6:4825050-4825386
BSY92_07447	chr6:5029789-5032010
BSY92_07473	chr6:5153946-5154255
BSY92_07550	chr6:5387440-5387899
BSY92_07551	chr6:5390271-5390607
BSY92_07552	chr6:5391883-5392667
BSY92_07734	chr6:6025796-6026489
BSY92_07794	chr4:143384-144682
BSY92_07798	chr4:155396-156856
BSY92_07807	chr4:184331-184898
BSY92_07809	chr4:187116-188701
BSY92_07868	chr4:415227-415812
BSY92_07869	chr4:417262-417754
BSY92_07871	chr4:420937-422115
BSY92_07895	chr4:511781-513236
BSY92_07900	chr4:523693-524218
BSY92_07968	chr4:766678-766977
BSY92_08286	chr4:1812611-1813403
BSY92_08393	chr4:2150897-2151636
BSY92_08424	chr4:2224956-2225544
BSY92_09162	chr4:4490436-4490841
BSY92_09171	chr4:4532743-4533323
BSY92_09177	chr4:4556294-4556750
BSY92_09179	chr4:4569109-4569514
BSY92_09209	chr4:4681563-4682292
BSY92_09214	chr4:4696455-4696905
BSY92_09251	chr4:4794792-4795910
BSY92_09280	chr4:4888292-4889615
BSY92_09288	chr4:4921689-4922097
BSY92_09291	chr4:4931746-4932013
BSY92_09293	chr4:4935841-4936279
BSY92_09315	chr4:4999776-5000145
BSY92_09338	chr4:5073051-5073724
BSY92_09354	chr4:5119267-5119603
BSY92_09457	chr5:28547-29231
BSY92_09472	chr5:135276-136931
BSY92_09487	chr5:180974-181904
BSY92_09511	chr5:254882-255633
BSY92_09995	chr5:1869392-1870235
BSY92_10392	chr5:3096010-3096469
BSY92_10482	chr5:3366149-3366807
BSY92_10732	chr5:4187636-4188569
BSY92_10741	chr5:4220018-4220869
BSY92_10776	chr5:4322241-4324279
BSY92_10825	chr7:87895-88249
BSY92_10852	chr7:157054-157821
BSY92_10894	chr7:252376-252709
BSY92_10902	chr7:277196-277793
BSY92_10948	chr7:446809-447349
BSY92_10964	chr7:505240-505889
BSY92_10975	chr7:577692-578031
BSY92_11002	chr7:653098-653512
BSY92_11005	chr7:666660-667379
BSY92_11160	chr7:1182475-1183112
BSY92_11311	chr7:1723595-1723895
BSY92_11420	chr7:2105855-2106783
BSY92_11620	chr7:2746139-2746730
BSY92_11623	chr7:2756012-2756850
BSY92_11628	chr7:2774772-2775246
BSY92_11629	chr7:2776285-2776797
BSY92_11667	chr7:2891877-2892321
BSY92_11715	chr7:3107223-3108631
BSY92_11735	chr7:3178144-3180970
BSY92_11811	chr7:3481997-3483593
BSY92_11819	chr7:3494268-3494865
BSY92_11821	chr7:3500339-3500579
BSY92_11824	chr7:3509758-3510091
BSY92_11842	chr7:3563819-3564149
BSY92_11850	chr7:3586233-3586593
BSY92_11864	chr7:3636685-3637255
BSY92_11877	chr7:3663888-3665052
BSY92_11886	chr7:3690432-3692182
BSY92_11887	chr7:3694164-3694713
BSY92_11889	chr7:3700429-3701473
BSY92_11924	chr7:3875863-3876299
BSY92_12070	scaf2:94892-95384
BSY92_12110	scaf2:610726-610960
